# Supplementary material
Source: publisher figshare collection journal article supplement (https://acs.figshare.com/ndownloader/files/4099105)
Supplement: Supplementary file 1 [file 4099105]

 
data_6 
 
_audit_creation_method            SHELXL-97 
_chemical_name_systematic 
; 
 ? 
; 
_chemical_name_common             ? 
_chemical_melting_point           ? 
_chemical_formula_moiety          
 'C20 H11 Cu2 N13 O, (H2 O)'
_chemical_formula_sum 
 'C20 H13 Cu2 N13 O2' 
_chemical_formula_weight          594.51 
 
loop_ 
 _atom_type_symbol 
 _atom_type_description 
 _atom_type_scat_dispersion_real 
 _atom_type_scat_dispersion_imag 
 _atom_type_scat_source 
 'C'  'C'   0.0033   0.0016 
 'International Tables Vol C Tables 4.2.6.8 and 6.1.1.4' 
 'H'  'H'   0.0000   0.0000 
 'International Tables Vol C Tables 4.2.6.8 and 6.1.1.4' 
 'N'  'N'   0.0061   0.0033 
 'International Tables Vol C Tables 4.2.6.8 and 6.1.1.4' 
 'O'  'O'   0.0106   0.0060 
 'International Tables Vol C Tables 4.2.6.8 and 6.1.1.4' 
 'Cu'  'Cu'   0.3201   1.2651 
 'International Tables Vol C Tables 4.2.6.8 and 6.1.1.4' 
 
_symmetry_cell_setting           'monoclinic'
_symmetry_space_group_name_H-M   'P2(1)/n'
 
loop_ 
 _symmetry_equiv_pos_as_xyz 
 'x, y, z' 
 '-x+1/2, y+1/2, -z+1/2' 
 '-x, -y, -z' 
 'x-1/2, -y-1/2, z-1/2' 
 
_cell_length_a                    9.9873(4) 
_cell_length_b                    20.0523(8) 
_cell_length_c                    11.4886(4) 
_cell_angle_alpha                 90.00 
_cell_angle_beta                  96.1380(10) 
_cell_angle_gamma                 90.00 
_cell_volume                      2287.61(15) 
_cell_formula_units_Z             4 
_cell_measurement_temperature     293(2) 
_cell_measurement_reflns_used     6031
_cell_measurement_theta_min       2.57
_cell_measurement_theta_max       24.57
 
_exptl_crystal_description        parallelepiped 
_exptl_crystal_colour             brown
_exptl_crystal_size_max           0.20 
_exptl_crystal_size_mid           0.06 
_exptl_crystal_size_min           0.04 
_exptl_crystal_density_meas       ? 
_exptl_crystal_density_diffrn     1.726 
_exptl_crystal_density_method     'not measured' 
_exptl_crystal_F_000              1192 
_exptl_absorpt_coefficient_mu     1.909 
_exptl_absorpt_correction_type    MULTI-SCAN 
_exptl_absorpt_correction_T_min   0.7014 
_exptl_absorpt_correction_T_max   0.9275 
_exptl_absorpt_process_details    SADABS 
 
_exptl_special_details 
; 
 ? 
; 
 
_diffrn_ambient_temperature       293(2) 
_diffrn_radiation_wavelength      0.71073 
_diffrn_radiation_type            MoK\a 
_diffrn_radiation_source          'fine-focus sealed tube' 
_diffrn_radiation_monochromator   graphite 
_diffrn_measurement_device_type   'CCD area detector'
_diffrn_measurement_method        'phi and omega scans'
_diffrn_detector_area_resol_mean  ? 
_diffrn_standards_number          ? 
_diffrn_standards_interval_count  ? 
_diffrn_standards_interval_time   ? 
_diffrn_standards_decay_%         ? 
_diffrn_reflns_number             47679 
_diffrn_reflns_av_R_equivalents   0.0382 
_diffrn_reflns_av_sigmaI/netI     0.0223 
_diffrn_reflns_limit_h_min        -13 
_diffrn_reflns_limit_h_max        13 
_diffrn_reflns_limit_k_min        -26 
_diffrn_reflns_limit_k_max        26 
_diffrn_reflns_limit_l_min        -14 
_diffrn_reflns_limit_l_max        14 
_diffrn_reflns_theta_min          2.03 
_diffrn_reflns_theta_max          27.66 
_reflns_number_total              5311 
_reflns_number_gt                 4088 
_reflns_threshold_expression      >2sigma(I) 
 
_computing_data_collection        'Bruker SMART'
_computing_cell_refinement        'Bruker SMART'
_computing_data_reduction         'Bruker SAINT'
_computing_structure_solution     'SHELXS-97 (Sheldrick, 2008)' 
_computing_structure_refinement   'SHELXL-97 (Sheldrick, 2008)' 
_computing_molecular_graphics     'Bruker SHELXTL'
_computing_publication_material   'Bruker SHELXTL'
 
_refine_special_details 
; 
 Refinement of F^2^ against ALL reflections.  The weighted R-factor wR and 
 goodness of fit S are based on F^2^, conventional R-factors R are based 
 on F, with F set to zero for negative F^2^. The threshold expression of 
 F^2^ > 2sigma(F^2^) is used only for calculating R-factors(gt) etc. and is 
 not relevant to the choice of reflections for refinement.  R-factors based 
 on F^2^ are statistically about twice as large as those based on F, and R- 
 factors based on ALL data will be even larger. 
; 
 
_refine_ls_structure_factor_coef  Fsqd  
_refine_ls_matrix_type            full 
_refine_ls_weighting_scheme       calc  
_refine_ls_weighting_details 
 'calc w=1/[\s^2^(Fo^2^)+(0.0509P)^2^+1.5325P] where P=(Fo^2^+2Fc^2^)/3' 
_atom_sites_solution_primary      direct 
_atom_sites_solution_secondary    difmap 
_atom_sites_solution_hydrogens    geom 
_refine_ls_hydrogen_treatment     mixed 
_refine_ls_extinction_method      none 
_refine_ls_extinction_coef        ? 
_refine_ls_number_reflns          5311 
_refine_ls_number_parameters      400 
_refine_ls_number_restraints      420 
_refine_ls_R_factor_all           0.0536 
_refine_ls_R_factor_gt            0.0364 
_refine_ls_wR_factor_ref          0.1029 
_refine_ls_wR_factor_gt           0.0938 
_refine_ls_goodness_of_fit_ref    1.047 
_refine_ls_restrained_S_all       1.016 
_refine_ls_shift/su_max           0.001 
_refine_ls_shift/su_mean          0.000 
 
loop_ 
 _atom_site_label 
 _atom_site_type_symbol 
 _atom_site_fract_x 
 _atom_site_fract_y 
 _atom_site_fract_z 
 _atom_site_U_iso_or_equiv 
 _atom_site_adp_type 
 _atom_site_occupancy 
 _atom_site_symmetry_multiplicity 
 _atom_site_calc_flag 
 _atom_site_refinement_flags 
 _atom_site_disorder_assembly 
 _atom_site_disorder_group 
Cu1 Cu 0.78661(4) 0.209102(16) 0.49820(3) 0.03957(11) Uani 1 1 d . . . 
Cu2 Cu 0.77219(3) 0.376254(16) 0.52292(3) 0.03837(11) Uani 1 1 d . . . 
O1 O 0.7548(2) 0.28850(9) 0.58333(16) 0.0450(5) Uani 1 1 d D . . 
H1 H 0.781(4) 0.2834(16) 0.6580(11) 0.067 Uiso 1 1 d D . . 
N1 N 0.8648(2) 0.14158(12) 0.3918(2) 0.0432(5) Uani 1 1 d U . . 
N2 N 0.8535(2) 0.26910(11) 0.37549(18) 0.0380(5) Uani 1 1 d U . . 
N3 N 0.8475(2) 0.33439(11) 0.38531(18) 0.0380(5) Uani 1 1 d U . . 
N4 N 0.8333(2) 0.45792(11) 0.4375(2) 0.0428(5) Uani 1 1 d U . . 
C1 C 0.8678(3) 0.07570(15) 0.4066(3) 0.0520(7) Uani 1 1 d U . . 
H1A H 0.8349 0.0576 0.4725 0.062 Uiso 1 1 calc R . . 
C2 C 0.9189(3) 0.03315(16) 0.3265(3) 0.0579(8) Uani 1 1 d U . . 
H2A H 0.9208 -0.0127 0.3392 0.069 Uiso 1 1 calc R . . 
C3 C 0.9658(3) 0.05916(17) 0.2297(3) 0.0590(8) Uani 1 1 d U . . 
H3A H 0.9992 0.0312 0.1749 0.071 Uiso 1 1 calc R . . 
C4 C 0.9638(3) 0.12761(16) 0.2128(3) 0.0528(7) Uani 1 1 d U . . 
H4A H 0.9953 0.1463 0.1468 0.063 Uiso 1 1 calc R . . 
C5 C 0.9139(3) 0.16735(14) 0.2959(2) 0.0413(6) Uani 1 1 d U . . 
C6 C 0.9112(3) 0.24055(14) 0.2895(2) 0.0406(6) Uani 1 1 d U . . 
C7 C 0.9664(3) 0.28003(16) 0.2054(3) 0.0486(7) Uani 1 1 d U . . 
H7A H 1.0073 0.2603 0.1450 0.058 Uiso 1 1 calc R . . 
C8 C 0.9590(3) 0.34780(15) 0.2140(2) 0.0441(6) Uani 1 1 d U . . 
H8A H 0.9937 0.3755 0.1596 0.053 Uiso 1 1 calc R . . 
C9 C 0.8971(3) 0.37425(14) 0.3080(2) 0.0407(6) Uani 1 1 d U . . 
C10 C 0.8841(3) 0.44594(14) 0.3348(2) 0.0412(6) Uani 1 1 d U . . 
C11 C 0.9194(3) 0.49675(16) 0.2644(3) 0.0511(7) Uani 1 1 d U . . 
H11A H 0.9528 0.4874 0.1937 0.061 Uiso 1 1 calc R . . 
C12 C 0.9049(3) 0.56196(16) 0.2994(3) 0.0583(8) Uani 1 1 d U . . 
H12A H 0.9279 0.5971 0.2525 0.070 Uiso 1 1 calc R . . 
C13 C 0.8555(3) 0.57422(16) 0.4055(3) 0.0572(8) Uani 1 1 d U . . 
H13A H 0.8465 0.6177 0.4318 0.069 Uiso 1 1 calc R . . 
C14 C 0.8201(3) 0.52118(15) 0.4709(3) 0.0509(7) Uani 1 1 d U . . 
H14A H 0.7855 0.5296 0.5414 0.061 Uiso 1 1 calc R . . 
N5 N 0.7826(3) 0.14948(13) 0.6321(2) 0.0510(6) Uani 1 1 d U . . 
C15 C 0.8249(3) 0.12450(14) 0.7168(2) 0.0423(6) Uani 1 1 d U . . 
N6 N 0.8604(3) 0.09097(14) 0.8116(2) 0.0625(8) Uani 1 1 d U . . 
C16 C 0.9696(3) 0.10442(14) 0.8794(2) 0.0414(6) Uani 1 1 d U . . 
N7 N 1.0624(3) 0.10982(14) 0.9451(2) 0.0559(6) Uani 1 1 d U . . 
N8 N 0.5759(3) 0.19464(15) 0.4163(3) 0.0633(8) Uani 1 1 d U . . 
C17 C 0.4675(4) 0.21042(15) 0.3867(3) 0.0501(7) Uani 1 1 d U . . 
N9 N 0.3433(3) 0.22578(17) 0.3436(2) 0.0678(8) Uani 1 1 d U . . 
C18 C 0.2598(4) 0.25266(19) 0.4116(3) 0.0657(9) Uani 1 1 d U . . 
N10 N 0.1814(4) 0.2782(2) 0.4591(4) 0.1065(14) Uani 1 1 d U . . 
N11 N 0.7734(3) 0.42000(13) 0.6741(2) 0.0497(6) Uani 1 1 d DU A . 
C19 C 0.7824(3) 0.43592(15) 0.7691(3) 0.0493(7) Uani 1 1 d DU . . 
N12 N 0.8180(14) 0.4544(7) 0.8774(8) 0.066(3) Uani 0.481(4) 1 d PDU A 1 
C20 C 0.750(4) 0.428(2) 0.9604(16) 0.062(3) Uani 0.481(4) 1 d PDU A 1 
N13 N 0.741(2) 0.4057(17) 1.0535(18) 0.093(5) Uani 0.481(4) 1 d PDU A 1 
N12A N 0.785(2) 0.4664(14) 0.8707(12) 0.063(3) Uani 0.420(6) 1 d PDU A 2 
C20A C 0.766(5) 0.431(3) 0.965(2) 0.067(4) Uani 0.420(6) 1 d PDU A 2 
N13A N 0.703(2) 0.4087(16) 1.0379(19) 0.073(4) Uani 0.420(6) 1 d PDU A 2 
N12B N 0.767(8) 0.464(6) 0.870(4) 0.063(4) Uani 0.099(5) 1 d PDU A 3 
C20B C 0.872(4) 0.452(2) 0.949(3) 0.068(5) Uani 0.099(5) 1 d PDU A 3 
N13B N 0.960(4) 0.446(2) 1.023(3) 0.104(12) Uani 0.099(5) 1 d PDU A 3 
O1W O 0.0952(8) 0.2032(4) 0.6572(7) 0.219(3) Uani 1 1 d D . . 
H1W H 0.131(12) 0.237(4) 0.609(8) 0.328 Uiso 1 1 d D . . 
H2W H 0.135(11) 0.166(3) 0.619(9) 0.328 Uiso 1 1 d D . . 
 
loop_ 
 _atom_site_aniso_label 
 _atom_site_aniso_U_11 
 _atom_site_aniso_U_22 
 _atom_site_aniso_U_33 
 _atom_site_aniso_U_23 
 _atom_site_aniso_U_13 
 _atom_site_aniso_U_12 
Cu1 0.0486(2) 0.03878(19) 0.03241(17) 0.00235(13) 0.00936(14) 0.00386(14) 
Cu2 0.04316(19) 0.04023(19) 0.03247(17) -0.00156(13) 0.00753(13) 0.00067(14) 
O1 0.0657(13) 0.0418(11) 0.0284(9) -0.0004(8) 0.0100(9) 0.0019(9) 
N1 0.0447(13) 0.0440(12) 0.0412(12) -0.0011(10) 0.0065(10) 0.0060(10) 
N2 0.0413(12) 0.0410(11) 0.0327(11) -0.0006(9) 0.0085(9) 0.0037(10) 
N3 0.0391(12) 0.0418(11) 0.0343(11) 0.0019(9) 0.0093(9) 0.0011(9) 
N4 0.0402(12) 0.0421(12) 0.0456(12) 0.0016(10) 0.0023(10) -0.0002(10) 
C1 0.0537(18) 0.0430(15) 0.0591(18) -0.0026(13) 0.0059(14) 0.0049(13) 
C2 0.0528(18) 0.0442(16) 0.076(2) -0.0086(14) 0.0024(16) 0.0071(14) 
C3 0.0500(18) 0.0563(17) 0.072(2) -0.0206(15) 0.0125(15) 0.0083(15) 
C4 0.0481(16) 0.0597(17) 0.0526(17) -0.0120(14) 0.0145(13) 0.0074(14) 
C5 0.0377(14) 0.0481(14) 0.0386(13) -0.0042(11) 0.0058(11) 0.0059(12) 
C6 0.0394(14) 0.0493(14) 0.0341(13) 0.0001(11) 0.0084(11) 0.0057(12) 
C7 0.0489(17) 0.0603(17) 0.0391(15) 0.0018(12) 0.0173(12) 0.0090(13) 
C8 0.0420(15) 0.0561(15) 0.0363(13) 0.0072(12) 0.0135(11) 0.0042(13) 
C9 0.0377(14) 0.0491(14) 0.0359(13) 0.0058(11) 0.0071(11) 0.0020(12) 
C10 0.0344(13) 0.0458(13) 0.0429(14) 0.0062(11) 0.0015(11) -0.0007(11) 
C11 0.0446(16) 0.0540(16) 0.0543(17) 0.0123(13) 0.0042(13) -0.0048(13) 
C12 0.0486(18) 0.0491(16) 0.075(2) 0.0193(15) -0.0036(15) -0.0067(14) 
C13 0.0484(18) 0.0441(16) 0.076(2) 0.0007(14) -0.0091(15) -0.0011(13) 
C14 0.0502(17) 0.0452(16) 0.0560(17) -0.0008(13) -0.0002(13) 0.0032(13) 
N5 0.0600(16) 0.0502(14) 0.0415(13) 0.0083(11) 0.0000(11) 0.0014(12) 
C15 0.0449(15) 0.0407(14) 0.0410(14) 0.0018(11) 0.0027(11) 0.0004(12) 
N6 0.0659(17) 0.0624(17) 0.0544(16) 0.0214(13) -0.0155(13) -0.0155(14) 
C16 0.0490(15) 0.0387(14) 0.0368(13) 0.0040(11) 0.0060(11) 0.0037(12) 
N7 0.0516(15) 0.0699(17) 0.0448(14) 0.0038(13) -0.0012(11) 0.0013(13) 
N8 0.0519(16) 0.0731(19) 0.0628(18) -0.0164(14) -0.0027(13) 0.0088(14) 
C17 0.0571(17) 0.0514(17) 0.0408(15) -0.0043(13) 0.0014(13) 0.0006(14) 
N9 0.0678(18) 0.086(2) 0.0466(15) -0.0067(14) -0.0070(13) 0.0159(16) 
C18 0.062(2) 0.065(2) 0.066(2) -0.0091(17) -0.0117(16) 0.0190(17) 
N10 0.079(3) 0.122(3) 0.118(3) -0.032(3) 0.011(2) 0.022(2) 
N11 0.0575(15) 0.0511(14) 0.0411(12) -0.0089(11) 0.0075(11) -0.0037(12) 
C19 0.0496(17) 0.0508(17) 0.0479(14) -0.0112(13) 0.0066(13) -0.0035(13) 
N12 0.067(6) 0.078(6) 0.052(3) -0.024(3) -0.004(3) 0.007(5) 
C20 0.075(7) 0.069(6) 0.038(3) -0.018(4) -0.008(4) 0.023(5) 
N13 0.122(13) 0.115(9) 0.039(5) 0.000(4) -0.011(7) 0.049(10) 
N12A 0.077(8) 0.063(5) 0.046(3) -0.019(3) 0.000(4) 0.014(6) 
C20A 0.085(9) 0.072(7) 0.043(4) -0.014(5) -0.005(5) 0.021(7) 
N13A 0.094(10) 0.084(7) 0.038(7) 0.001(5) -0.002(6) 0.042(8) 
N12B 0.074(9) 0.067(8) 0.046(5) -0.018(6) 0.001(6) 0.010(8) 
C20B 0.079(9) 0.072(9) 0.052(6) -0.022(8) -0.005(7) 0.011(8) 
N13B 0.13(2) 0.10(2) 0.08(2) 0.017(18) -0.037(15) 0.00(2) 
O1W 0.188(6) 0.264(7) 0.226(7) -0.086(6) 0.125(5) -0.066(5) 
 
_geom_special_details 
; 
 All esds (except the esd in the dihedral angle between two l.s. planes) 
 are estimated using the full covariance matrix.  The cell esds are taken 
 into account individually in the estimation of esds in distances, angles 
 and torsion angles; correlations between esds in cell parameters are only 
 used when they are defined by crystal symmetry.  An approximate (isotropic) 
 treatment of cell esds is used for estimating esds involving l.s. planes. 
; 
 
loop_ 
 _geom_bond_atom_site_label_1 
 _geom_bond_atom_site_label_2 
 _geom_bond_distance 
 _geom_bond_site_symmetry_2 
 _geom_bond_publ_flag 
Cu1 O1 1.9129(18) . ? 
Cu1 N5 1.952(2) . ? 
Cu1 N2 2.021(2) . ? 
Cu1 N1 2.035(2) . ? 
Cu1 N8 2.231(3) . ? 
Cu1 Cu2 3.3682(5) . ? 
Cu1 Cu2 7.2898(5) 4_565 ? 
Cu1 Cu1 7.3817(2) 4_565 ? 
Cu2 O1 1.9063(19) . ? 
Cu2 N11 1.945(2) . ? 
Cu2 N3 2.006(2) . ? 
Cu2 N4 2.036(2) . ? 
Cu2 N7 2.206(3) 4_565 ? 
Cu2 Cu1 7.5191(5) 4_565 ? 
Cu2 Cu2 8.7998(4) 4_565 ? 
O1 H1 0.876(10) . ? 
N1 C1 1.332(4) . ? 
N1 C5 1.355(3) . ? 
N2 N3 1.316(3) . ? 
N2 C6 1.326(3) . ? 
N3 C9 1.330(3) . ? 
N4 C14 1.336(4) . ? 
N4 C10 1.354(4) . ? 
C1 C2 1.391(4) . ? 
C1 H1A 0.9300 . ? 
C2 C3 1.357(5) . ? 
C2 H2A 0.9300 . ? 
C3 C4 1.386(5) . ? 
C3 H3A 0.9300 . ? 
C4 C5 1.377(4) . ? 
C4 H4A 0.9300 . ? 
C5 C6 1.470(4) . ? 
C6 C7 1.407(4) . ? 
C7 C8 1.365(4) . ? 
C7 H7A 0.9300 . ? 
C8 C9 1.404(4) . ? 
C8 H8A 0.9300 . ? 
C9 C10 1.479(4) . ? 
C10 C11 1.370(4) . ? 
C11 C12 1.380(5) . ? 
C11 H11A 0.9300 . ? 
C12 C13 1.385(5) . ? 
C12 H12A 0.9300 . ? 
C13 C14 1.370(4) . ? 
C13 H13A 0.9300 . ? 
C14 H14A 0.9300 . ? 
N5 C15 1.135(3) . ? 
C15 N6 1.297(4) . ? 
N6 C16 1.298(4) . ? 
C16 N7 1.137(4) . ? 
N7 Cu2 2.206(3) 4_666 ? 
N8 C17 1.144(4) . ? 
C17 N9 1.322(4) . ? 
N9 C18 1.317(5) . ? 
C18 N10 1.125(5) . ? 
N11 C19 1.131(4) . ? 
C19 N12 1.310(9) . ? 
C19 N12A 1.315(10) . ? 
C19 N12B 1.316(15) . ? 
N12 C20 1.334(18) . ? 
C20 N13 1.174(15) . ? 
N12A C20A 1.331(19) . ? 
C20A N13A 1.179(17) . ? 
N12B C20B 1.33(2) . ? 
C20B N13B 1.162(17) . ? 
O1W H1W 0.965(10) . ? 
O1W H2W 0.968(10) . ? 
 
loop_ 
 _geom_angle_atom_site_label_1 
 _geom_angle_atom_site_label_2 
 _geom_angle_atom_site_label_3 
 _geom_angle 
 _geom_angle_site_symmetry_1 
 _geom_angle_site_symmetry_3 
 _geom_angle_publ_flag 
O1 Cu1 N5 95.07(9) . . ? 
O1 Cu1 N2 86.93(8) . . ? 
N5 Cu1 N2 161.91(10) . . ? 
O1 Cu1 N1 163.00(10) . . ? 
N5 Cu1 N1 96.17(10) . . ? 
N2 Cu1 N1 78.48(10) . . ? 
O1 Cu1 N8 97.06(10) . . ? 
N5 Cu1 N8 98.91(11) . . ? 
N2 Cu1 N8 98.67(11) . . ? 
N1 Cu1 N8 93.75(10) . . ? 
O1 Cu1 Cu2 28.07(6) . . ? 
N5 Cu1 Cu2 122.58(8) . . ? 
N2 Cu1 Cu2 59.11(6) . . ? 
N1 Cu1 Cu2 137.33(7) . . ? 
N8 Cu1 Cu2 96.78(8) . . ? 
O1 Cu1 Cu2 115.85(7) . 4_565 ? 
N5 Cu1 Cu2 111.99(8) . 4_565 ? 
N2 Cu1 Cu2 82.90(6) . 4_565 ? 
N1 Cu1 Cu2 71.25(7) . 4_565 ? 
N8 Cu1 Cu2 25.31(8) . 4_565 ? 
Cu2 Cu1 Cu2 105.293(9) . 4_565 ? 
O1 Cu1 Cu1 94.44(6) . 4_565 ? 
N5 Cu1 Cu1 132.87(8) . 4_565 ? 
N2 Cu1 Cu1 64.62(6) . 4_565 ? 
N1 Cu1 Cu1 87.21(7) . 4_565 ? 
N8 Cu1 Cu1 34.05(8) . 4_565 ? 
Cu2 Cu1 Cu1 79.224(9) . 4_565 ? 
Cu2 Cu1 Cu1 26.534(4) 4_565 4_565 ? 
O1 Cu2 N11 94.78(9) . . ? 
O1 Cu2 N3 87.54(8) . . ? 
N11 Cu2 N3 157.75(10) . . ? 
O1 Cu2 N4 164.06(9) . . ? 
N11 Cu2 N4 95.41(10) . . ? 
N3 Cu2 N4 78.44(9) . . ? 
O1 Cu2 N7 98.32(10) . 4_565 ? 
N11 Cu2 N7 102.69(10) . 4_565 ? 
N3 Cu2 N7 98.84(9) . 4_565 ? 
N4 Cu2 N7 91.36(10) . 4_565 ? 
O1 Cu2 Cu1 28.18(5) . . ? 
N11 Cu2 Cu1 121.87(8) . . ? 
N3 Cu2 Cu1 59.61(6) . . ? 
N4 Cu2 Cu1 137.90(7) . . ? 
N7 Cu2 Cu1 97.99(7) 4_565 . ? 
O1 Cu2 Cu1 90.32(6) . 4_565 ? 
N11 Cu2 Cu1 139.52(8) . 4_565 ? 
N3 Cu2 Cu1 62.42(6) . 4_565 ? 
N4 Cu2 Cu1 89.86(6) . 4_565 ? 
N7 Cu2 Cu1 36.94(7) 4_565 4_565 ? 
Cu1 Cu2 Cu1 74.669(8) . 4_565 ? 
O1 Cu2 Cu2 68.84(6) . 4_565 ? 
N11 Cu2 Cu2 142.32(8) . 4_565 ? 
N3 Cu2 Cu2 58.62(6) . 4_565 ? 
N4 Cu2 Cu2 109.06(7) . 4_565 ? 
N7 Cu2 Cu2 50.22(7) 4_565 4_565 ? 
Cu1 Cu2 Cu2 53.041(8) . 4_565 ? 
Cu1 Cu2 Cu2 22.079(3) 4_565 4_565 ? 
Cu2 O1 Cu1 123.75(10) . . ? 
Cu2 O1 H1 116(2) . . ? 
Cu1 O1 H1 111(2) . . ? 
C1 N1 C5 118.5(2) . . ? 
C1 N1 Cu1 126.0(2) . . ? 
C5 N1 Cu1 115.47(18) . . ? 
N3 N2 C6 121.4(2) . . ? 
N3 N2 Cu1 120.74(16) . . ? 
C6 N2 Cu1 117.72(19) . . ? 
N2 N3 C9 121.1(2) . . ? 
N2 N3 Cu2 120.55(16) . . ? 
C9 N3 Cu2 118.23(19) . . ? 
C14 N4 C10 118.4(3) . . ? 
C14 N4 Cu2 125.5(2) . . ? 
C10 N4 Cu2 115.89(18) . . ? 
N1 C1 C2 121.9(3) . . ? 
N1 C1 H1A 119.1 . . ? 
C2 C1 H1A 119.1 . . ? 
C3 C2 C1 119.3(3) . . ? 
C3 C2 H2A 120.3 . . ? 
C1 C2 H2A 120.3 . . ? 
C2 C3 C4 119.6(3) . . ? 
C2 C3 H3A 120.2 . . ? 
C4 C3 H3A 120.2 . . ? 
C5 C4 C3 118.5(3) . . ? 
C5 C4 H4A 120.8 . . ? 
C3 C4 H4A 120.8 . . ? 
N1 C5 C4 122.2(3) . . ? 
N1 C5 C6 114.5(2) . . ? 
C4 C5 C6 123.3(3) . . ? 
N2 C6 C7 120.2(3) . . ? 
N2 C6 C5 113.7(2) . . ? 
C7 C6 C5 126.2(2) . . ? 
C8 C7 C6 118.8(3) . . ? 
C8 C7 H7A 120.6 . . ? 
C6 C7 H7A 120.6 . . ? 
C7 C8 C9 117.6(3) . . ? 
C7 C8 H8A 121.2 . . ? 
C9 C8 H8A 121.2 . . ? 
N3 C9 C8 120.8(3) . . ? 
N3 C9 C10 113.4(2) . . ? 
C8 C9 C10 125.7(2) . . ? 
N4 C10 C11 121.7(3) . . ? 
N4 C10 C9 113.8(2) . . ? 
C11 C10 C9 124.5(3) . . ? 
C10 C11 C12 119.4(3) . . ? 
C10 C11 H11A 120.3 . . ? 
C12 C11 H11A 120.3 . . ? 
C11 C12 C13 118.8(3) . . ? 
C11 C12 H12A 120.6 . . ? 
C13 C12 H12A 120.6 . . ? 
C14 C13 C12 118.8(3) . . ? 
C14 C13 H13A 120.6 . . ? 
C12 C13 H13A 120.6 . . ? 
N4 C14 C13 122.7(3) . . ? 
N4 C14 H14A 118.6 . . ? 
C13 C14 H14A 118.6 . . ? 
C15 N5 Cu1 155.3(3) . . ? 
N5 C15 N6 172.8(3) . . ? 
C15 N6 C16 122.2(3) . . ? 
N7 C16 N6 172.4(3) . . ? 
C16 N7 Cu2 162.4(2) . 4_666 ? 
C17 N8 Cu1 155.4(3) . . ? 
N8 C17 N9 174.8(3) . . ? 
C18 N9 C17 120.0(3) . . ? 
N10 C18 N9 172.7(4) . . ? 
C19 N11 Cu2 168.8(3) . . ? 
N11 C19 N12 168.9(7) . . ? 
N11 C19 N12A 168.2(11) . . ? 
N12 C19 N12A 18.0(11) . . ? 
N11 C19 N12B 165.7(18) . . ? 
N12 C19 N12B 23.7(19) . . ? 
N12A C19 N12B 8(6) . . ? 
C19 N12 C20 117.5(17) . . ? 
N13 C20 N12 154(4) . . ? 
C19 N12A C20A 119(2) . . ? 
N13A C20A N12A 156(5) . . ? 
C19 N12B C20B 112(2) . . ? 
N13B C20B N12B 174(4) . . ? 
H1W O1W H2W 95.0(13) . . ? 
 
loop_ 
 _geom_hbond_atom_site_label_D 
 _geom_hbond_atom_site_label_H 
 _geom_hbond_atom_site_label_A 
 _geom_hbond_distance_DH 
 _geom_hbond_distance_HA 
 _geom_hbond_distance_DA 
 _geom_hbond_angle_DHA 
 _geom_hbond_site_symmetry_A 
O1 H1 N9  0.876(10) 2.164(11) 3.039(3) 178(3) 4_666 
O1W H1W N10  0.965(10) 2.02(5) 2.932(9) 156(10) . 
O1W H2W N13  0.968(10) 1.99(3) 2.95(3) 172(11) 4_565 
O1W H2W N13A  0.968(10) 1.93(3) 2.90(2) 176(11) 4_565 
 
_diffrn_measured_fraction_theta_max    0.998 
_diffrn_reflns_theta_full              27.66 
_diffrn_measured_fraction_theta_full   0.998 
_refine_diff_density_max    0.743 
_refine_diff_density_min   -0.506 
_refine_diff_density_rms    0.067 
